# Supplementary material for: Transcriptomic and Metabolomic Analyses of the Response of Resistant Peanut Seeds to Aspergillus flavus Infection
Source: MDPI journal article supplement (doi:10.3390/toxins15070414), 2023-06-26
Supplement: s1 [file s1]

The most enriched GO terms (YT1/YCK1)

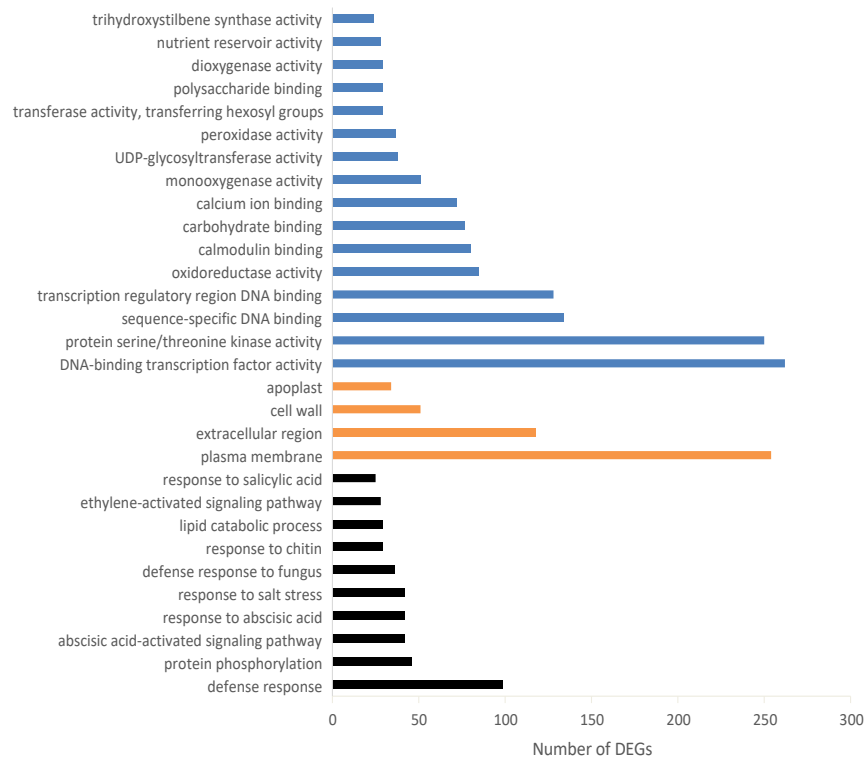

The most enriched GO terms (YT2/YCK2)

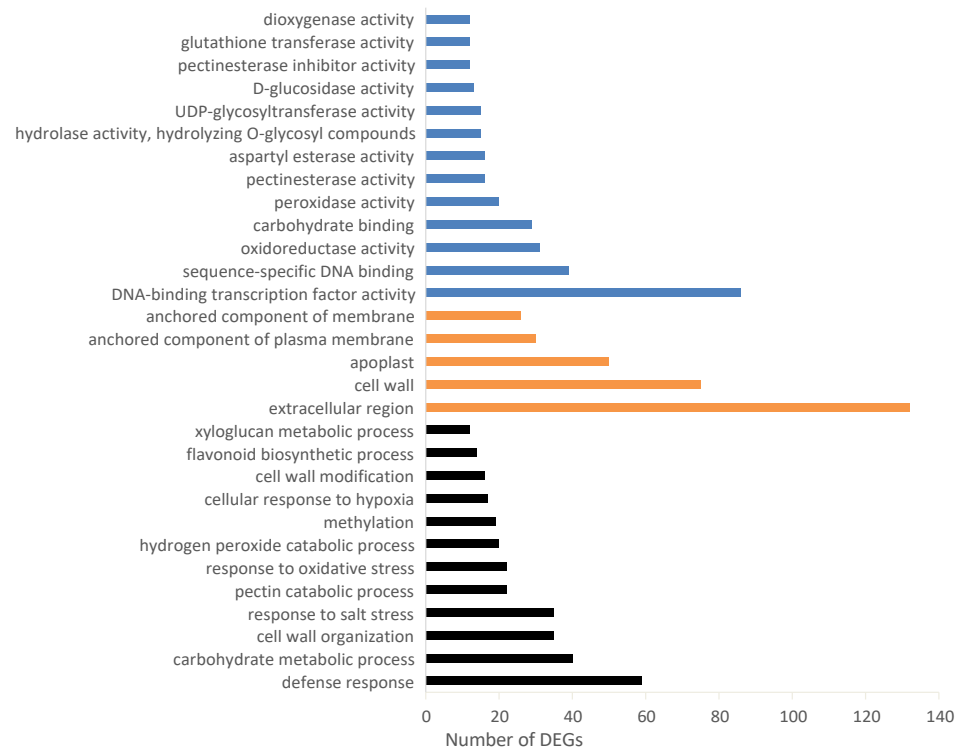

The most enriched GO terms (YT3/YCK3)

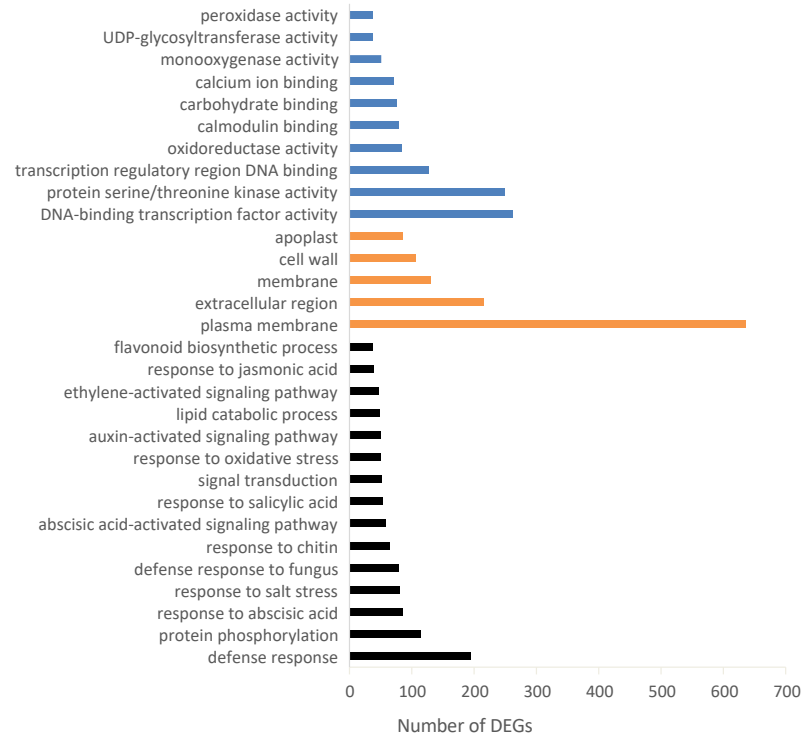

The most enriched GO terms (ZT1/ZCK1)

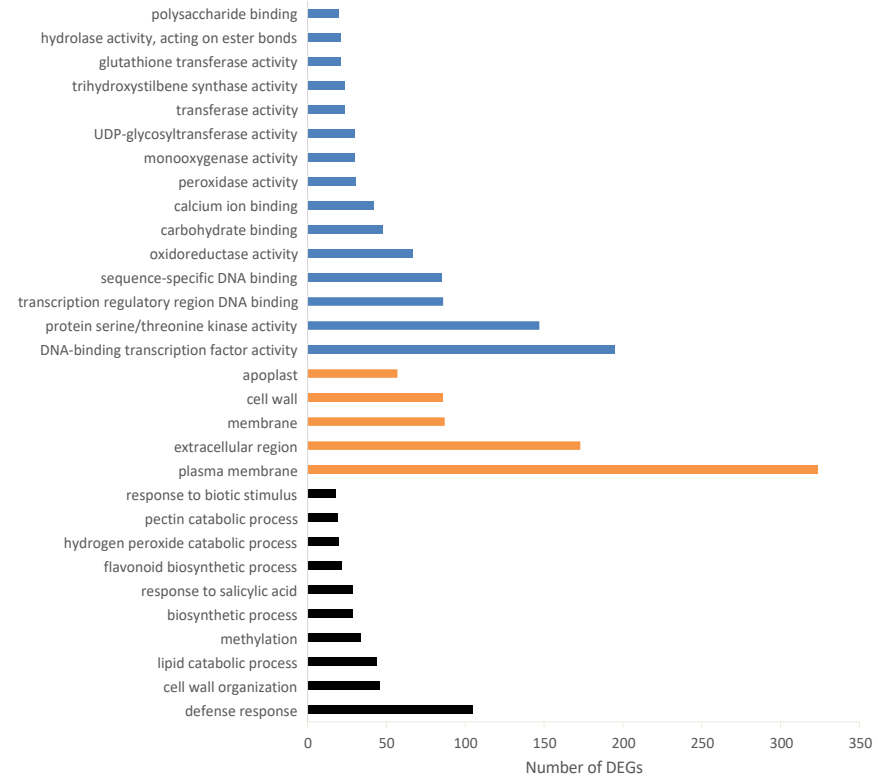

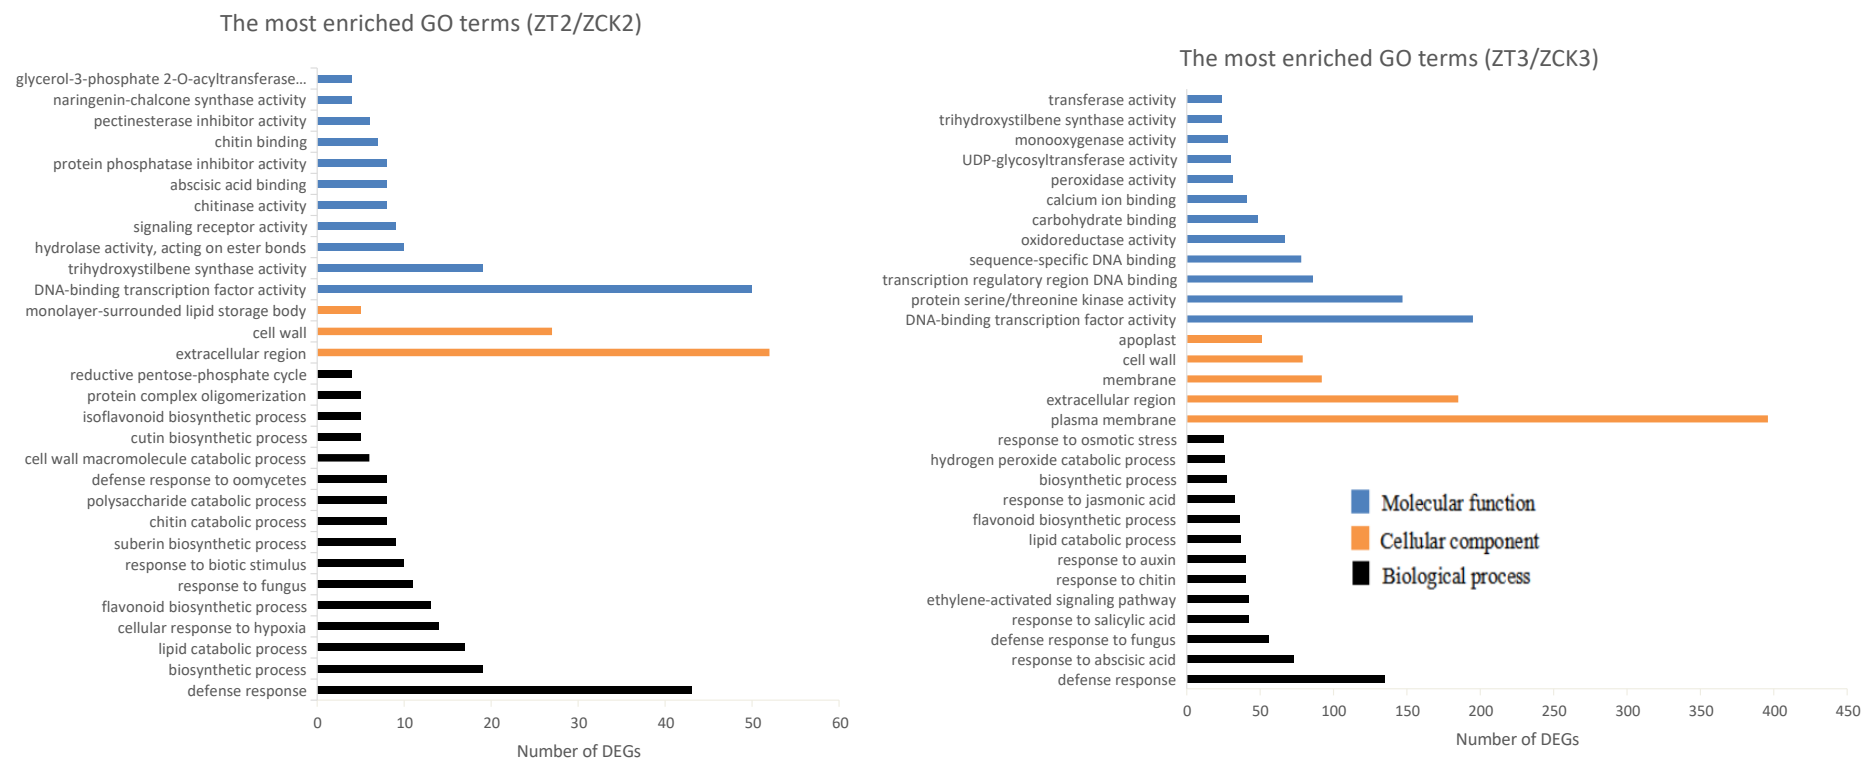

Figure S1: Top 30 GO term enriched functional categories Note: horizontal is number of DEGs , ordinate is GO term . Different colors are used to distinguish Biological Process(BP), Cellular Component(CC) and Molecular Function(MF) .
