# Supplementary material for: Transcriptomic and Metabolomic Analyses of the Response of Resistant Peanut Seeds to Aspergillus flavus Infection
Source: MDPI journal article supplement (doi:10.3390/toxins15070414), 2023-06-26
Supplement: s1 [file s1]

**Table S2:** The quality assessment table of sequencing data and list of mapping results

| sample<br>name | total_raw<br>_reads | total_clean_<br>reads | total_clean<br>_bases | clean_read_<br>Q20 | clean_read_Q<br>30 | clean_reads_<br>ratio | total_mapping<br>_gene_ratio | uniquely_mapping_<br>gene_ratio |
|----------------|---------------------|-----------------------|-----------------------|--------------------|--------------------|-----------------------|------------------------------|---------------------------------|
| Y_CK1          | 47.91               | 44.50                 | 6.68                  | 96.45              | 91.34              | 92.91                 | 76.25                        | 74.33                           |
| Y_CK2          | 47.91               | 44.53                 | 6.68                  | 96.43              | 91.30              | 92.97                 | 74.14                        | 72.02                           |
| Y_CK3          | 48.50               | 44.69                 | 6.70                  | 96.49              | 91.43              | 92.17                 | 73.46                        | 71.35                           |
| Y_T1           | 47.91               | 44.93                 | 6.74                  | 96.45              | 91.32              | 93.79                 | 74.97                        | 73.06                           |
| Y_T2           | 48.50               | 44.45                 | 6.67                  | 96.39              | 91.17              | 91.73                 | 75.56                        | 73.46                           |
| Y_T3           | 47.91               | 44.70                 | 6.71                  | 96.41              | 91.23              | 93.30                 | 69.57                        | 67.26                           |
| Z_CK1          | 47.33               | 44.32                 | 6.65                  | 96.49              | 91.38              | 93.64                 | 76.21                        | 74.24                           |
| Z_CK2          | 46.78               | 44.37                 | 6.65                  | 96.47              | 91.30              | 94.86                 | 74.22                        | 72.72                           |
| Z_CK3          | 47.91               | 44.62                 | 6.70                  | 96.34              | 91.06              | 93.14                 | 74.29                        | 72.31                           |
| Z_T1           | 47.33               | 44.41                 | 6.66                  | 96.90              | 92.17              | 93.83                 | 72.46                        | 70.24                           |
| Z_T2           | 47.33               | 44.43                 | 6.66                  | 96.94              | 92.24              | 93.87                 | 74.56                        | 71.53                           |
| Z_T3           | 47.33               | 44.20                 | 6.63                  | 96.90              | 92.13              | 93.40                 | 73.50                        |                                 |
