# Supplementary material for: Transcriptomic and Metabolomic Analyses of the Response of Resistant Peanut Seeds to Aspergillus flavus Infection
Source: MDPI journal article supplement (doi:10.3390/toxins15070414), 2023-06-26
Supplement: s1 [file s1]

**Table S1:** Primers used for analysis of gene expression by Real Time qRT-PCR

| Primers                                                            | Sequences           |
|--------------------------------------------------------------------|---------------------|
| 13S-LOX(LOC107476778)-f                                            | TCGTTGGTCGGAGAATAG  |
| 13S-LOX(LOC107476778)-r                                            | GCGACGGAACCAGTATCA  |
| 4-coumarate--CoA ligase 2-like (LOC1074774 20) - f                 | AATGAGAAGGCGACAGCA  |
| 4-coumarate--CoA ligase 2-like (LOC1074774 20)-r                   | TCTTGAATGGAAGGGTGG  |
| cellulose synthase(LOC107461063)-f                                 | AACCACATTGCCAGAAGC  |
| cellulose synthase(LOC107461063)-r                                 | TTTGAAGTCCTGGGCTGA  |
| chalcone synthase(LOC107483336)-f                                  | ATGGTGGTTGTGGAGGTT  |
| chalcone synthase(LOC107483336)-r                                  | GAGTTTGGTGAGTCGGTA  |
| chalcone--flavonone isomerase 1A (LOC107467625)-f                  | TTATGGCGACGCAGAAGC  |
| chalcone--flavonone isomerase 1A (LOC107467625)-r                  | TGGCGGTAGAAGACGGAGG |
| chitinase(LOC107461673)-f                                          | CGCAGTTTCTTCGCTCAC  |
| chitinase(LOC107461673)-r                                          | GCAAAGGTATCAGGGTCT  |
| ethylene-responsive transcription factor<br>ERF098(LOC107493082)-f | TCCGAATGTTATCTATCTG |
| ethylene-responsive transcription factor<br>ERF098(LOC107493082)-r | AATCCCTCTGTAGTGTCTC |
| pathogenesis-related protein 2 (LOC107463224)-f                    | CGGAACCATCAAGAAACT  |
| pathogenesis-related protein 2 (LOC107463224)-r                    | GAGCCACTCCTCCAACAA  |
| Pectinesterase (LOC107475712)-f                                    | GCGTTCTGGATCTGACTT  |
| Pectinesterase (LOC107475712)-r                                    | GTTTGGAGGGTTTCTTGC  |
| peroxidase A2 (LOC107483153)-f                                     | TAGCAGCAGTGGAACCC   |
| peroxidase A2 (LOC107483153)-r                                     | TAGTCCCTGACCCACCAT  |
| phenylalanine ammonia-lyase class 3 (LOC107496075)-f               | ATCTCCACCTACTCGTT   |
| phenylalanine ammonia-lyase class 3 (LOC107496075)-r               | CAGCCATCTTCCTTCCTA  |
| stilbene synthase 3(LOC107482389)-f                                | TCGTACTCTTAGGGCTCG  |
| stilbene synthase 3(LOC107482389)-r                                | ACCACGGAAGTGATTGA   |
