# Supplementary material for: Transcriptomic and Metabolomic Analyses of the Response of Resistant Peanut Seeds to Aspergillus flavus Infection
Source: Toxins (Basel). 2023 Jun 26;15(7):414. doi: 10.3390/toxins15070414 (PMC10467056; doi:10.3390/toxins15070414)
Supplement: Supplementary file 1 [file toxins-15-00414-s001.zip]

Archive with 5 entries (5 files):
- Figure S1.pdf
- Figure S2.pdf
- Table S1.pdf
- table S2.pdf
- Table S3.xlsx
