# Supplementary material for: Transcriptomic and Metabolomic Analyses of the Response of Resistant Peanut Seeds to Aspergillus flavus Infection
Source: Toxins (Basel). 2023 Jun 26;15(7):414. doi: 10.3390/toxins15070414 (PMC10467056; doi:10.3390/toxins15070414)
Supplement: Supplementary file 1 [file toxins-15-00414-s001.zip › Table S3.xlsx]

## Sheet: PR ,chitinase and glucanase
genebank	gene_symbol	diffexp_log2fc_Y_CK1-vs-Y_T1	diffexp_log2fc_Y_CK2-vs-Y_T2	diffexp_log2fc_Y_CK3-vs-Y_T3	diffexp_log2fc_Z_CK1-vs-Z_T1	diffexp_log2fc_Z_CK3-vs-Z_T3	diffexp_log2fc_Z_CK3-vs-Z_T3
pathogenesis-related protein 1	LOC107468499	3.22254	5.55852	0	2.66221	0	2.3332
pathogenesis-related protein 1	LOC107468687	4.34512	8.45294	0	5.66968	4.80663	3.06983
pathogenesis-related protein 2	LOC107462570	1.36805	10.4577	-1.41261	8.37837	8.85088	4.66825
pathogenesis-related protein 2	LOC107463224	2.75311	7.64848	-1.33652	5.68316	7.35991	2.45308
pathogenesis-related protein 2	LOC107463213	2.96681	7.05476	-0.669201	6.05911	7.28485	2.3838
pathogenesis-related protein 2	LOC107462603	6.29916	11.4846	-1.49369	9.13442	8.79341	4.78707
pathogenesis-related protein 2	LOC107462593	5.97263	10.5847	-1.60932	8.59902	8.94012	4.25576
pathogenesis-related protein 2	LOC107462584	4.27531	9.17678	-1.94584	7.474	8.42753	3.82271
pathogenesis-related protein 2	LOC110273078	3.62646	8.29057	-1.22151	6.34411	7.76011	3.86139
pathogenesis-related protein 2	LOC107463234	2.92277	8.07687	-1.71037	5.7928	7.59494	3.12314
pathogenesis-related protein 5	LOC107484369	0.809894	0.243658	1.22968	2.15058	0.511984	0.00545481
pathogenesis-related protein 5	LOC107468804	0.361335	-0.748368	1.04512	4.42545	-1.80876	0.396869
pathogenesis-related protein 5	LOC107493246	1.77439	3.40233	-1.37361	3.57792	-0.215611	-3.55563
pathogenesis-related protein 5	LOC107460312	-1.28805	0.835566	0.518558	-1.09014	2.04725	-0.810586
pathogenesis-related protein 1	LOC107459890	-0.659864	-1.25534	4.35119	0.569798	-1.54011	-1.29295
pathogenesis-related protein 1	LOC107459874	-0.316759	-5.1481	3.39148	-0.0225961	0.817386	0.856866
pathogenesis-related protein 4	LOC107492034	4.62766	7.94062	-1.76228	5.97297	7.95304	4.16231
pathogenesis-related protein 2	LOC107483518	4.62798	10.1989	-0.0486081	4.06737	8.71289	2.75448
pathogenesis-related protein 1	LOC107468493	2.93375	-0.00243916	5.09247	1.40964	4.72391	-0.678815
pathogenesis-related protein 10	LOC107483491	3.13239	5.08409	-0.583053	5.34061	6.18375	1.62299
endochitinase	LOC107477929	-3.38577	8.7107	0.530396	1.13664	9.5391	1.46674
endochitinase	LOC107476050	-4.49246	3.95165	-0.0420571	3.39297	5.06715	5.06815
endochitinase	LOC107476742	4.08313	5.21843	2.17078	3.6842	2.44801	2.21784
endochitinase	LOC107461405	5.26001	11.2319	0.296138	6.49622	9.45588	4.02156
endochitinase	LOC107476072	1.22258	3.58193	-1.06914	2.87322	5.64546	2.60245
endochitinase	LOC107487419	4.10111	5.66534	-3.51121	5.49248	7.83934	2.35108
acidic endochitinase	LOC107464745	5.96676	7.97134	-2.75022	5.25898	8.01495	4.07256
basic endochitinase	LOC107472789	0.804119	5.0228	0.941831	6.93757	5.9943	5.39172
chitinase	LOC107465043	1.24468	6.51155	2.85258	3.74631	-0.805159	0.470093
chitinase	LOC107461673	-0.0372179	5.42625	2.49069	2.21375	3.53143	0.753566
endo-1,3;1,4-beta-D-glucanase	LOC107471522	-0.948701	5.35309	4.38202	0.0761549	4.19468	1.68865
endo-1,3;1,4-beta-D-glucanase	LOC107482671	1.2347	4.95086	-2.50866	4.44262	4.87796	-1.77015
endo-1,3;1,4-beta-D-glucanase	LOC107464833	1.14026	2.28034	-0.484187	2.6934	2.48142	-0.509357
endo-1,3;1,4-beta-D-glucanase	LOC107465491	1.11709	2.08226	-0.0671942	1.49383	2.12162	-0.292298

## Sheet: Phenylpropanoids
genebank	gene_symbol	diffexp_log2fc_Y_CK1-vs-Y_T1	diffexp_log2fc_Y_CK2-vs-Y_T2	diffexp_log2fc_Y_CK3-vs-Y_T3	diffexp_log2fc_Z_CK1-vs-Z_T1	diffexp_log2fc_Z_CK3-vs-Z_T3	diffexp_log2fc_Z_CK3-vs-Z_T3
phenylalanine ammonialyase	LOC107496075	3.58541	7.34732	-1.01212	4.15739	5.83658	1.39191
chalcone synthase	LOC107483336	10.1231	8.14981	-2.63538	9.77861	10.0529	5.5138
chalcone synthase	LOC107477342	5.73682	2.45389	-1.63783	0.974271	10.3984	4.41331
chalcone synthase	LOC107488457	7.27745	5.83862	-2.22702	2.891	10.4918	6.5848
chalcone synthase	LOC107488455	5.93403	3.25321	-1.79599	1.9389	8.86298	5.324
chalcone--flavonone isomerase	LOC107467625	1.94681	5.60541	-0.287221	3.80061	3.9836	0.358392
chalcone--flavonone isomerase	LOC107467675	0.678618	2.58887	-0.664251	1.91382	3.00819	0.137127
chalcone--flavonone isomerase	LOC107467674	0.743232	3.62074	1.18465	1.41368	3.76043	0.750271
chalcone--flavonone isomerase	LOC107470197	2.41197	4.62811	-0.700885	1.9425	4.86679	1.11629
putative stilbene synthase 2	LOC107483284	3.07085	11.6274	0.144972	6.29865	7.07052	2.68171
putative stilbene synthase 2	LOC107483331	4.74105	11.1289	0.053318	5.49562	7.37556	3.73996
stilbene synthase 1	LOC107483328	4.83745	11.5877	0.585629	6.31766	6.98191	2.44693
stilbene synthase 1	LOC107483325	3.6933	11.5615	0.678148	5.93727	6.83788	2.85351
stilbene synthase 1	LOC107483285	3.90989	11.2953	0.187378	6.03593	8.10795	1.47901
stilbene synthase 1	LOC107483329	4.24738	11.0282	0.688114	6.24066	6.86864	3.10762
stilbene synthase 1	LOC107483326	3.3299	10.9395	0.799343	5.91185	6.83214	1.94265
stilbene synthase 1	LOC107483332	3.89549	10.7086	0.233989	6.47108	6.636	2.94447
stilbene synthase 1	LOC107483281	3.26618	10.5314	-0.273961	5.58127	5.6218	2.59774
stilbene synthase 3	LOC107483337	4.27385	12.484	0.020418	6.16076	9.57167	3.49009
stilbene synthase 3	LOC107483286	4.56643	10.8828	0.385224	6.88509	7.17434	2.84892
stilbene synthase 3	LOC107483338	5.36998	10.8113	-0.364959	6.81531	7.85239	3.37829
stilbene synthase 3	LOC107483333	4.33326	10.7946	0.309119	5.73032	7.37639	2.59203
stilbene synthase 3	LOC107483339	4.44899	10.5952	0.175328	6.04708	6.24193	2.17012
stilbene synthase 3	LOC107483283	4.91105	10.5281	0.211172	6.91896	6.20502	2.56939
stilbene synthase 3	LOC107483335	4.52696	10.3457	-0.435976	6.01517	6.82881	2.04755
stilbene synthase 3	LOC107482389	5.0084	10.324	-0.296357	6.57632	6.75395	3.34602
stilbene synthase 3	LOC107483290	4.9423	10.2133	0.485323	6.76144	7.55075	3.07981
stilbene synthase 3	LOC107483344	4.60462	10.0671	1.06737	7.15883	6.74028	3.1525
stilbene synthase 3	LOC107483289	4.95277	9.65555	0.793288	6.07972	5.64607	2.84986
stilbene synthase 3	LOC107483324	2.5774	9.57277	-0.112433	4.92178	5.0157	2.19183
stilbene synthase 3	LOC107483341	4.7498	9.07834	0.77661	5.69127	5.26782	1.63207
stilbene synthase 3	LOC107483282	5.43725	9.5185	0.832758	6.34129	5.95466	2.15804
stilbene synthase 3	LOC107466501	2.87284	8.70022	-0.762393	5.59165	5.43554	1.76624
4-coumarate--CoA ligase 2	LOC107477420	6.25014	8.63342	-0.339201	5.43026	5.33691	3.56082
4-coumarate--CoA ligase 2	LOC107477353	3.06896	6.99876	-0.0496632	5.03688	4.9587	4.20344
4-coumarate--CoA ligase 2	LOC107477352	1.38474	6.48964	0.536651	3.75271	2.22345	2.33889
4-coumarate--CoA ligase 2	LOC110272335	-0.44217	0.6185	-0.429552	2.48885	2.61134	-0.433667
4-coumarate--CoA ligase-like 5	LOC107472408	-1.76214	7.10254	-0.229223	1.03648	3.70278	0.348054

## Sheet: POD
genebank	gene_symbol	diffexp_log2fc_Y_CK1-vs-Y_T1	diffexp_log2fc_Y_CK2-vs-Y_T2	diffexp_log2fc_Y_CK3-vs-Y_T3	diffexp_log2fc_Z_CK1-vs-Z_T1	diffexp_log2fc_Z_CK3-vs-Z_T3	diffexp_log2fc_Z_CK3-vs-Z_T3
peroxidase 10	LOC107487775	0.403713	1.60156	0.0581096	1.73565	7.43131	2.3332
peroxidase 11	LOC107491254	-1.6856	1.0766	-3.13573	3.63494	3.58186	-6.0083
peroxidase 15	LOC107492884	-1.09927	0.630756	1.53355	3.42251	0.634207	0.0972216
peroxidase 21	LOC107463671	-2.71086	1.351	4.63989	6.74606	0.648036	-0.628609
peroxidase 31	LOC107495082	0.877504	-0.694237	2.47032	1.22615	-3.13164	-1.52359
peroxidase 39	LOC107477749	-1.33523	-1.01203	5.8906	4.42955	-3.88353	-0.661787
peroxidase 4	LOC107458152	-1.48167	6.89284	0.761571	0.194865	7.23415	-0.80012
peroxidase 46	LOC107495621	1.81502	2.75052	-0.0477385	2.60041	4.63686	2.32329
peroxidase 5	LOC107470119	-0.133016	-2.18482	6.33145	0.099307	-8.61004	-0.185681
peroxidase 50-like	LOC107481006	0.217964	-5.21433	1.0667	0.599086	2.6385	-0.105282
peroxidase 51	LOC107481407	-0.836692	4.53037	1.65355	-0.969674	2.16637	-0.372045
peroxidase 51	LOC107487669	1.03611	-2.72886	0.950526	0.662654	1.50999	0.113054
peroxidase 53-like	LOC107483166	0	2.74356	-1.01145	1.57495	4.22147	0
peroxidase 55	LOC107494801	4.15678	6.79269	0.0262385	1.97972	2.55606	-0.411361
peroxidase A2	LOC107483153	1.24176	5.30321	1.79563	2.20174	6.55131	-0.524402
peroxidase A2	LOC107483151	0.292058	2.59749	0.472166	1.07547	6.05001	0.681953
peroxidase A2	LOC107464786	2.56522	1.26864	6.09487	5.167	-2.12568	0.00919346
peroxidase P7	LOC107473776	0.447431	0	2.84648	6.22075	-1.18266	-0.675582
peroxidase P7	LOC107462414	-0.0994155	4.43937	1.94797	2.82549	4.24526	1.79408
probable peroxidase 26	LOC107461475	0.217844	-0.614838	2.40902	6.16669	-0.225906	-5.36046
cationic peroxidase 1	LOC107467673	-3.98069	0	5.94056	7.62893	0.740893	-0.318687
cationic peroxidase 1	LOC107485222	2.74211	11.0399	2.29215	2.00111	6.67701	0.663142
cationic peroxidase 1	LOC107458153	-0.694668	5.12084	-0.640417	2.96528	7.39611	1.74736
cationic peroxidase 2	LOC107468746	2.34683	7.12528	2.91293	2.15379	-3.99525	0.485555
L-ascorbate peroxidase 3, peroxisomal	LOC107476561	-1.14784	2.05355	0.416466	2.72266	0.63927	1.7156
L-ascorbate peroxidase 3, peroxisomal	LOC107487471	0.094905	1.06845	1.60475	3.314	1.06231	-0.273516
lignin-forming anionic peroxidase	LOC107477192	5.26699	10.2007	3.73684	4.14842	5.16745	1.11882

## Sheet: Physical defense-related genes
genebank	gene_symbol	diffexp_log2fc_Y_CK1-vs-Y_T1	diffexp_log2fc_Y_CK2-vs-Y_T2	diffexp_log2fc_Y_CK3-vs-Y_T3	diffexp_log2fc_Z_CK1-vs-Z_T1	diffexp_log2fc_Z_CK3-vs-Z_T3	diffexp_log2fc_Z_CK3-vs-Z_T3
non-specific lipid transfer protein GPI-anchored 1	LOC107482126	0.756336	1.52073	-0.430279	2.09174	1.05979	-0.882307
non-specific lipid transfer protein GPI-anchored 1-like	LOC107482371	3.29516	1.44344	0	2.14049	3.39355	1.01513
non-specific lipid transfer protein-like 1	LOC107473384	0	-2.53783	-3.22055	3.61623	0.740893	-4.77479
non-specific lipid-transfer protein 1-like	LOC107475167	0	4.01595	NA	-1.58934	8.3442	1.74736
non-specific lipid-transfer protein 1-like	LOC107475686	0.475007	-2.98663	-0.938189	2.53242	-0.900077	-1.57675
non-specific lipid-transfer protein 2	LOC107489887	2.80795	-0.9145	-0.0496631	3.943	-2.06937	0.480574
non-specific lipid-transfer protein 8	LOC107458887	0.902464	-4.92988	-0.7404	2.90766	-1.30452	-4.37705
non-specific lipid-transfer protein-like protein At2g13820	LOC107488498	-0.407221	1.18457	-3.93422	2.70013	0.598257	-1.20295
non-specific lipid-transfer protein-like protein At2g13820	LOC107466963	0	-1.91404	-7.74036	2.89551	-3.06509	-3.50751
non-specific lipid-transfer protein-like protein At5g64080	LOC107488495	0.488952	2.09202	-7.69307	2.70937	1.06276	-1.31358
protein ECERIFERUM 1	LOC107472630	1.34065	-2.28259	-1.5524	2.07052	-0.989449	-1.8834
protein ECERIFERUM 2	LOC107459376	1.00646	-1.28297	-1.90583	2.37379	0.482229	-1.28911
protein ECERIFERUM 26-like	LOC107482290	0.00797191	-1.51382	-0.13684	2.66746	1.54809	1.13264
protein ECERIFERUM 3-like	LOC107492418	0.899444	-3.62521	2.16672	4.30355	-0.898969	-1.08968
protein HOTHEAD	LOC107464287	1.95551	-1.46284	-0.465711	3.09144	-1.80996	-0.217639
protein HOTHEAD	LOC107461520	1.59996	-2.20944	-1.08668	3.12767	-0.656655	0.184501
fatty acyl-CoA reductase 3	LOC107476516	-0.534202	2.60804	0.642162	0.788771	2.68339	2.2388
fatty acyl-CoA reductase 3-like	LOC107477637	0.482178	-6.33579	-2.95403	3.84	-6.0939	-2.5862
cellulose synthase-like protein D3	LOC107477351	2.15847	-0.0236707	1.67236	2.55046	-1.69539	0.643509
cellulose synthase-like protein E1	LOC107461063	2.10748	3.31726	-0.863385	2.98271	2.30065	0.129855
cellulose synthase-like protein H1	LOC107461961	0.316895	2.39463	-2.81413	7.22241	-2.01878	-1.34633
pectinesterase	LOC107488639	-1.19899	1.96159	2.64308	-1.79193	3.43707	0.399172
pectinesterase	LOC107473218	-0.580093	1.25064	2.73373	-0.523102	3.85927	-0.231731
pectinesterase 2	LOC107475490	3.84391	13.7962	1.95904	8.8354	7.34053	2.95028
pectinesterase 2	LOC107475712	4.13271	10.6948	4.0629	2.27868	7.56394	1.87895
pectinesterase 2-like	LOC107475491	4.97898	12.8597	3.11789	3.39981	11.7404	1.20688
pectinesterase 2-like	LOC107475492	4.80494	12.8326	4.08938	3.02506	8.86978	-0.10949
pectinesterase 31	LOC107471153	-1.04256	0.735927	-0.198797	2.99426	0.586373	0.435045
pectinesterase-like	LOC107492177	1.27366	0	2.69835	4.39458	0	0
pectinesterase-like	LOC107475979	8.15601	12.3426	3.72735	7.03423	10.0749	2.58504
pectinesterase-like	LOC107481085	-2.2501	3.70928	8.58061	8.7477	3.13465	-1.07128
pectinesterase-like	LOC107491475	0.0572652	2.36697	3.25803	5.35127	1.45657	-1.11387
xyloglucan endotransglucosylase/hydrolase 1	LOC107494566	0.578891	3.31905	2.59075	1.76681	4.63957	1.03912
probable xyloglucan endotransglucosylase/hydrolase protein	LOC107475873	-0.881205	0.458773	3.75347	4.16677	0.740893	1.21884
probable xyloglucan endotransglucosylase/hydrolase protein 32	LOC107476273	0.475665	-0.840969	0.0658009	2.59812	2.53543	1.4634

## Sheet: transcription factor
st_gene_id	gene_id	gene_symbol	genebank	diffexp_log2fc_Y_CK1-vs-Y_T1	diffexp_log2fc_Y_CK2-vs-Y_T2	diffexp_log2fc_Y_CK3-vs-Y_T3	diffexp_log2fc_Z_CK1-vs-Z_T1	diffexp_log2fc_Z_CK3-vs-Z_T3	diffexp_log2fc_Z_CK3-vs-Z_T3
G130453_6295	107464795	LOC107464795	AP2-like ethylene-responsive transcription factor AIL1	0.862983	3.30178	0.81831	3.16961	2.8431	1.36278
G130453_25890	107487622	LOC107487622	AP2-like ethylene-responsive transcription factor ANT	0.736256	1.00136	0.573752	0.77013	2.02697	0.564239
G130453_3126	107461219	LOC107461219	AP2-like ethylene-responsive transcription factor ANT	1.95311	-1.34562	-0.397436	3.19235	1.78967	0.178105
G130453_3048	107461136	LOC107461136	AP2-like ethylene-responsive transcription factor At1g16060	0.862485	3.13749	2.48136	2.20329	2.6218	-1.95508
G130453_13927	107473678	LOC107473678	ethylene-responsive transcription factor 1B-like	-2.56159	7.24688	0.370299	2.7846	5.03243	-1.81116
G130453_13907	107473655	LOC107473655	ethylene-responsive transcription factor 1B-like	2.30278	7.01158	-0.676338	0.877652	4.2523	0.178415
G130453_13867	107473609	LOC107473609	ethylene-responsive transcription factor 1B-like	-1.9535	5.43129	0.912105	1.8113	2.22201	0.852278
G130453_13872	107473615	LOC107473615	ethylene-responsive transcription factor 1B-like	-0.0826434	1.52819	0.0363179	1.76403	3.26028	3.73996
G130453_11159	107470449	LOC107470449	ethylene-responsive transcription factor ERF003-like	-1.26273	1.02813	4.16815	1.93432	3.15166	0.850361
G130453_32816	107495729	LOC107495729	ethylene-responsive transcription factor ERF011	0.238164	1.28295	-2.04432	1.04103	0.578526	-0.0943296
G130453_26533	107488356	LOC107488356	ethylene-responsive transcription factor ERF022	2.70085	1.08391	-1.41021	2.08354	1.37732	-1.04571
G130453_8249	107467108	LOC107467108	ethylene-responsive transcription factor ERF027	-1.95161	-0.26573	1.23126	2.86392	7.93815	-1.58035
G130453_27105	107489031	LOC107489031	ethylene-responsive transcription factor ERF027-like	2.12401	1.00905	-0.0496631	2.12665	5.16095	-1.07128
G130453_17324	107477632	LOC107477632	ethylene-responsive transcription factor ERF039	2.01409	2.42989	1.03972	1.1683	5.6433	-1.94632
G130453_17554	107477889	LOC107477889	ethylene-responsive transcription factor ERF054-like	1.42076	2.9153	-0.889689	-0.860733	2.283	-1.2023
G130453_26505	107488324	LOC107488324	ethylene-responsive transcription factor ERF061	0.304589	1.21826	-0.876874	0.334242	2.93086	-2.2321
G130453_13945	107473700	LOC107473700	ethylene-responsive transcription factor ERF098	1.54951	7.95179	-0.343542	3.21149	4.58004	-0.601602
G130453_24598	107486142	LOC107486142	ethylene-responsive transcription factor ERF098	1.26039	5.04111	-1.3451	1.24583	2.61691	0.189005
G130453_30605	107493082	LOC107493082	ethylene-responsive transcription factor ERF098	3.0451	3.78315	-0.073626	1.83641	2.37129	-1.12114
G130453_7589	107466340	LOC107466340	ethylene-responsive transcription factor ERF098-like	1.75396	12.9849	-2.49283	4.20616	11.1962	0
G130453_5105	107463444	LOC107463444	ethylene-responsive transcription factor ERF114	2.93655	3.61359	-0.578374	2.91064	2.06619	-1.86502
G130453_19390	107480073	LOC107480073	ethylene-responsive transcription factor ERF115-like	4.91856	2.60792	0.820485	2.39749	1.75752	-0.140859
G130453_20314	107481147	LOC107481147	ethylene-responsive transcription factor ESR1-like	5.23443	-6.92539	0.220512	4.66419	4.16393	0.627132
G130453_20151	107480954	LOC107480954	ethylene-responsive transcription factor RAP2-3	0.484953	3.94338	-0.045124	3.41797	2.23873	-3.55352
G130453_10084	107469167	LOC107469167	ethylene-responsive transcription factor RAP2-4-like	-2.13725	1.57722	0.924988	3.98626	3.34479	1.52416
G130453_18137	107478590	LOC107478590	ethylene-responsive transcription factor TINY	1.40209	-2.59723	-0.424763	2.36642	0.606413	-0.480827
G130453_26494	107488312	LOC107488312	MYB-like transcription factor ETC3	3.34073	4.9276	0.912105	6.99411	3.55899	-0.563689
G130453_3820	107462012	LOC107462012	MYB-like transcription factor ETC3	1.63759	2.21808	-0.632113	3.94522	3.67507	0.852278
G130453_16997	107477264	LOC107477264	NAC transcription factor 32	4.00429	4.08564	-0.917393	2.11012	2.25259	0.219052
G130453_24332	107485833	LOC107485833	probable WRKY transcription factor 24	2.75663	-3.75511	-1.01145	3.67401	-0.220877	-4.39665
G130453_15347	107475420	LOC107475420	probable WRKY transcription factor 26	5.50636	3.03439	-0.209824	2.1271	1.31436	-1.01337
G130453_20809	107481695	LOC107481695	probable WRKY transcription factor 28	3.42677	4.70298	-2.75998	3.81419	3.61629	0.573903
G130453_17391	107477708	LOC107477708	probable WRKY transcription factor 31	0.16278	7.25184	-4.04917	2.47499	5.40418	1.95133
G130453_12757	107472292	LOC107472292	probable WRKY transcription factor 33	2.62417	3.11535	-0.410121	2.52049	1.70291	-0.693272
G130453_22233	107483275	LOC107483275	probable WRKY transcription factor 35	-0.518862	0.71737	0.834008	0.502832	-3.90586	-0.645941
G130453_32710	107495603	LOC107495603	probable WRKY transcription factor 40	2.11698	6.68068	-4.05301	3.94053	5.38413	5.40151
G130453_11304	107470609	LOC107470609	probable WRKY transcription factor 40	3.10535	4.0977	-0.23323	3.53596	2.67627	0.0636114
G130453_26503	107488322	LOC107488322	probable WRKY transcription factor 41	2.98516	4.04731	0.483229	2.53942	4.25195	1.64273
G130453_12624	107472118	LOC107472118	probable WRKY transcription factor 47	2.96377	4.85606	1.16354	5.03674	6.37548	2.59259
G130453_23476	107484783	LOC107484783	probable WRKY transcription factor 49	0.70538	3.5064	-0.378464	1.2705	0.649296	2.95346
G130453_2937	107461015	LOC107461015	probable WRKY transcription factor 50	2.34184	8.40493	-1.01145	2.43503	6.63686	1.3765
G130453_19642	107480370	LOC107480370	probable WRKY transcription factor 50	0.988894	5.5856	0.49924	3.9556	5.05751	1.09758
G130453_32638	107495525	LOC107495525	probable WRKY transcription factor 50	1.12988	1.30791	0.912105	4.89812	6.19124	2.75009
G130453_23896	107485308	LOC107485308	probable WRKY transcription factor 70	1.07125	6.04747	-1.50958	2.9025	4.23401	2.49236
G130453_10920	107470163	LOC107470163	probable WRKY transcription factor 70	-0.656407	4.76166	-1.76899	1.06192	3.21402	-0.847289
G130453_33481	107496496	LOC107496496	probable WRKY transcription factor 71	1.90265	2.93749	-2.16707	2.69801	1.78104	-0.435602
G130453_19331	107480007	LOC107480007	probable WRKY transcription factor 75	6.3359	11.0949	-2.88244	4.7984	7.33084	2.59404
G130453_31945	107494745	LOC107494745	probable WRKY transcription factor 75	2.28775	5.80104	-2.00982	3.00529	4.46462	-0.497501
G130453_3803	107461994	LOC107461994	transcription factor MYB102-like	0.141914	0.497526	-2.46358	2.41347	2.80898	0.113441
G130453_17630	107477981	LOC107477981	transcription factor MYB102-like	-1.72957	-3.45328	-6.81426	2.70547	2.95878	-0.692618
G130453_5462	107463830	LOC107463830	transcription factor MYB108	3.39252	5.75326	-3.43907	4.02549	3.05856	-0.786074
G130453_22301	107483357	LOC107483357	transcription factor MYB108	0.364006	5.19554	-1.89332	0.939686	5.33713	1.40935
G130453_6450	107464972	LOC107464972	transcription factor MYB108-like	3.43112	5.11577	0.295777	2.04288	2.3023	-0.199887
G130453_29914	107492301	LOC107492301	transcription factor MYB108-like	1.38793	3.60877	-2.50978	2.9188	4.90314	-0.118626
G130453_25066	107486698	LOC107486698	transcription factor MYB35-like	2.07255	-1.39189	-0.055442	2.19964	0.128469	1.87026
G130453_25368	107487051	LOC107487051	transcription factor MYB39-like	-1.41844	7.04138	-2.50347	2.71153	4.58209	-0.84322
G130453_25369	107487052	LOC107487052	transcription factor MYB39-like	-1.90765	6.39699	-1.63314	-0.719641	3.02482	-0.429364
G130453_6219	107464712	LOC107464712	transcription factor MYB3-like	5.00493	-2.80925	0	3.46201	0.740893	2.32946
G130453_28276	107490464	LOC107490464	transcription factor MYB52-like	-0.680736	1.04959	0.54021	2.51271	0	-1.11251
G130453_1267	107459102	LOC107459102	transcription factor MYB74-like	-0.0992831	-2.40814	-1.884	1.86298	0	-1.00626
G130453_18497	107479003	LOC107479003	transcription factor MYB86-like	2.10695	-2.61444	-3.71662	2.95444	0.866613	0.811442
G130453_13466	107473130	LOC107473130	transcription factor MYB8-like	-0.679392	3.1084	0.912105	3.58167	4.444	2.06202
G130453_18576	107479100	LOC107479100	transcription factor MYB8-like	1.89716	-4.26681	-1.90157	2.13501	1.13375	0
G130453_1405	107459267	LOC107459267	WRKY transcription factor 55	4.08455	7.06234	-1.884	2.16443	3.63673	0

## Sheet: LOX 
genebank	gene_symbol	diffexp_log2fc_Y_CK1-vs-Y_T1	diffexp_log2fc_Y_CK2-vs-Y_T2	diffexp_log2fc_Y_CK3-vs-Y_T3	diffexp_log2fc_Z_CK1-vs-Z_T1	diffexp_log2fc_Z_CK3-vs-Z_T3	diffexp_log2fc_Z_CK3-vs-Z_T3
linoleate 13S-lipoxygenase 2-1, chloroplastic	LOC107476778	1.97441	4.60803	0.0457281	3.1745	2.22112	2.11006
linoleate 13S-lipoxygenase 2-1, chloroplastic-like	LOC107476782	2.09644	5.22593	2.13621	4.16641	2.76615	0.478766
linoleate 13S-lipoxygenase 3-1, chloroplastic	LOC107480797	0.816523	1.25246	0.0294624	2.59765	1.44546	1.33545
linoleate 13S-lipoxygenase 3-1, chloroplastic	LOC107491873	5.3298	5.35693	0.0669528	2.14706	3.06885	1.0257
linoleate 9S-lipoxygenase-like	LOC107461394	1.68941	3.65213	1.95528	3.22875	3.73776	0.449878
probable linoleate 9S-lipoxygenase 5	LOC107492121	4.46953	11.1974	2.38299	9.28713	7.23884	0.828433
delta(8)-fatty-acid desaturase 1	LOC107461234	2.10241	-0.498416	3.27098	-1.3833	2.70738	0.12775
delta(8)-fatty-acid desaturase 2-like	LOC107489425	0.801158	-0.275164	2.65185	2.47603	-0.536424	-0.998949
fatty acid desaturase 4, chloroplastic	LOC107479953	-1.03608	5.9669	-2.3745	2.03254	6.12912	0.620648
omega-3 fatty acid desaturase, chloroplastic	LOC107484970	2.12859	2.98346	2.22666	4.11456	2.23459	1.1701
omega-6 fatty acid desaturase, endoplasmic reticulum isozyme 1	LOC107467337	0.846426	3.42922	0.829357	2.33036	4.45543	1.28024
omega-6 fatty acid desaturase, endoplasmic reticulum isozyme 2	LOC107492893	1.18012	1.32145	0.866077	2.51425	1.40299	1.65488
